23 Siim Pauklin PhD

24 Group leader and CRUK Career Development Fellow

25 Botnar Research Centre, Nuffield Department of Orthopaedics, Rheumatology and

26 Musculoskeletal Sciences, University of Oxford, Headington, Oxford OX3 7LD, UK.

27 Tel: +44 (0)-1865226492

28 Email: [siim.pauklin@ndorms.ox.ac.uk](mailto:siim.pauklin@ndorms.ox.ac.uk)

29

30 Jinguo Xu, MD, PhD

31 Associate Professor

32 Department of Cardiovascular Surgery, First Affiliated Hospital of Anhui Medical

33 University, Hefei, Anhui, 230022, China

34 Tel: +86 (551)-65908735

35 Email: [xujinguo@ahmu.edu.cn](mailto:xujinguo@ahmu.edu.cn)

36

37 Yining Yang MD, PhD

38 Professor

39 Department of Cardiology, People's Hospital of Xinjiang Uygur Autonomous Region,

40 Urumqi, Xinjiang Uygur Autonomous Region, 830000, China.

41 Xinjiang Key Laboratory of Cardiovascular Homeostasis and Regeneration Research,

42 Urumqi, Xinjiang Uygur Autonomous Region, 830000, China.

43 Tel:+86 (0991)-960200

44 Email: [yangyn5126@xjrmyy.com](mailto:yangyn5126@xjrmyy.com)

45

46 Yuliang Feng MD, PhD

47 Associate Professor

48 Department of Pharmacology, Joint Laboratory of Guangdong-Hong Kong

49 Universities for Vascular Homeostasis and Diseases, School of Medicine, Southern

50 University of Science and Technology, Shenzhen, Guangdong, 518055, China.

51 Tel:+86 (755)-88012564

52 Email: fengyl@sustech.edu.cn

53

54 **Abstract**

55 Cardiovascular diseases (CVDs) are the leading cause of death worldwide, with  
56 chronic kidney disease (CKD) identified as a significant risk factor. CKD is primarily  
57 monitored through the estimated glomerular filtration rate (eGFR), calculated using the  
58 CKD-EPI equation. Although epidemiological and clinical studies have consistently  
59 demonstrated strong associations between eGFR and CVDs, the genetic underpinnings  
60 of this relationship remain elusive. Recent genome-wide association studies (GWAS)  
61 have highlighted the polygenic nature of these conditions and identified several risk  
62 loci correlating with their cross-phenotypes. Nonetheless, the extent and pattern of their  
63 pleiotropic effects have yet to be fully elucidated. We analyzed the most  
64 comprehensive GWAS summary statistics, involving around 7.5 million individuals, to  
65 investigate the shared genetic architectures and the underlying mechanisms between  
66 eGFR and CVDs, focusing on single nucleotide polymorphisms (SNPs), genes,  
67 biological pathways, and proteins exhibiting pleiotropic effects. Our study identified  
68 508 distinct genomic locations associated with pleiotropic effects across multiple traits,  
69 involving 379 unique genes, notably *L3MBTL3* (6q23.1), *MMP24* (20q11.22), and  
70 *ABO* (9q34.2). Additionally, pathways such as stem cell population maintenance and  
71 the glutathione metabolism pathway were pivotal in mediating the relationships  
72 between these traits. From the perspective of vertical pleiotropy, our findings suggest a  
73 causal relationship between eGFR and conditions such as atrial fibrillation and venous  
74 thromboembolism. These insights significantly enhance our understanding of the

75 genetic links between eGFR and CVDs, potentially guiding the development of novel

76 therapeutic strategies and improving the clinical management of these conditions.

77

78 **Keywords**

79 Estimated glomerular filtration rate, Cardiovascular disease, Shared genetic

80 architectures, GWAS

81

## 82 **Introduction**

83 Cardiovascular diseases (CVDs) are the leading cause of mortality and disability  
84 globally, accounting for one-third of all deaths.<sup>1</sup> The American Heart Association  
85 anticipates that by 2035, the economic impact of CVDs will escalate to approximately  
86 \$1.1 trillion. Among the diverse risk factors, chronic kidney disease (CKD) is  
87 particularly significant, as it exacerbates heart disease.<sup>2</sup> CKD leads to an increased  
88 production of reactive oxygen species (ROS) through oxidative stress, resulting in  
89 endothelial dysfunction—a critical precursor to atherosclerosis and an elevated risk of  
90 cardiovascular events.<sup>3</sup> Affecting about 9.1% of the global population, as the World  
91 Health Organization reported in 2023, CKD is diagnosed and monitored by measuring  
92 the estimated glomerular filtration rate (eGFR), utilizing the CKD-EPI equation. An  
93 eGFR below 60 mL/min/1.73 m<sup>2</sup> signifies notable kidney impairment.<sup>4,5</sup> Research by  
94 Go et al. has demonstrated a clear, graded association between declining eGFR and  
95 increased cardiovascular events.<sup>6,7</sup> Additionally, studies focusing on older adults reveal  
96 that the risk of CVDs increases from 15% for those with an eGFR of 90 mL/min/1.73  
97 m<sup>2</sup> to 40% for individuals at 30 mL/min/1.73 m<sup>2</sup> over three years.<sup>8</sup> The Framingham  
98 Heart Study supports these findings, showing that individuals with mildly reduced  
99 eGFR levels (60 to 79 mL/min per 1.73 m<sup>2</sup>) face a higher risk of CVDs than those with  
100 higher eGFR.<sup>9</sup> These studies underscore the significance of eGFR as a robust  
101 biomarker for assessing cardiovascular risk, highlighting its crucial role in clinical  
102 practice.

103 Genome-wide association studies (GWAS) have identified hundreds of variants  
104 contributing to the risk of eGFR and CVDs, some of which are shared risk loci. For  
105 example, Graham and colleagues pinpointed 147 loci associated with eGFR, seven  
106 demonstrating significant co-localization with cardiovascular traits, highlighting a  
107 genetic link between eGFR and various CVD phenotypes.<sup>10</sup> Genetic pleiotropy, where  
108 a single genetic variant influences multiple traits, is prevalent in complex human  
109 diseases, particularly in loci associated with CVDs. This pleiotropy can be vertical,

110 where a variant's effect on one trait impacts another, or horizontal, where a variant  
111 independently affects several traits. Mendelian randomization (MR) analyses utilizing  
112 vertical pleiotropy have estimated causal relationships between eGFR and CVDs. For  
113 example, Kelly et al. established a causal link between declining eGFR and increased  
114 stroke risk,<sup>11</sup> while Geurts et al. identified a bidirectional causal relationship between  
115 eGFR and atrial fibrillation (AF).<sup>12,13</sup> However, recent studies suggest that eGFR does  
116 not significantly affect other CVDs, such as AF, coronary artery disease (CAD), stroke,  
117 and heart failure (HF). These inconsistencies in MR results, possibly due to residual  
118 biases and unmeasured confounders, necessitate further investigation. Furthermore, the  
119 study by Gong et al. highlights the role of horizontal pleiotropy in explaining the  
120 common genetic architecture of human phenotypes, within the context of recent  
121 advances in genomic statistical tools.<sup>14</sup> Despite these advances, the extent of horizontal  
122 pleiotropy between eGFR and CVDs still needs to be explored, and the common  
123 genetic mechanisms must be fully elucidated. Therefore, there is a critical need for  
124 systematic research to investigate the shared genetic architectures between eGFR and  
125 CVDs, to identify shared polygenic risk variants, and to explore the involvement of  
126 specific molecular biological pathways.

127 In this study, we conducted an extensive analysis leveraged the latest GWAS summary  
128 statistics for European ancestry to explore the genetic associations between eGFR and  
129 six major CVDs, including AF, CAD, Venous Thromboembolism (VTE), HF,  
130 Peripheral Artery Disease (PAD), and Stroke. Firstly, the shared genetic basis is  
131 determined by quantifying the overall and local genetic correlations and exploring the  
132 overall genetic overlap. On this common genetic basis, in-depth research was  
133 conducted on the potential genetic mechanisms underlying these traits. Regarding  
134 horizontal pleiotropy, first, pleiotropy variation at the single nucleotide polymorphism  
135 (SNP) level is detected, and then co-localization analysis is performed to locate  
136 candidate causal variations accurately. Subsequently, position mapping and expression  
137 quantitative trait loci (eQTL) mapping were used at the gene level to identify candidate  
138 multi-effect genes. In addition, we conducted enrichment analysis on biological

139 pathways and elucidated the biological functions of genes associated with multiple  
140 effector sites. We also investigated the potential association between plasma protein  
141 levels and disease susceptibility and evaluated its potential as a therapeutic target.  
142 Finally, MR analysis was conducted at the level of vertical pleiotropy, using whole  
143 genome SNP data to estimate bidirectional causal effects while considering  
144 confounding factors and sample overlap. In conclusion, our comprehensive analysis of  
145 pleiotropy revealed the intricate genetic interactions between eGFR and CVDs. This  
146 work provides a promising path for a deeper understanding of their genetic associations,  
147 laying a solid foundation for future studies and driving new insights and targets in  
148 prevention, early diagnosis, and personalized treatment.

149

## 150 **Methods**

### 151 **Study Design**

152 Figure 1 presents the workflow for this study.

153

### 154 **Data selection and quality control**

155 GWAS summary statistics for eGFR were sourced from the most extensive publicly  
156 accessible meta-analysis to date, encompassing two primary datasets (n = 1,004,040): (i)  
157 from the CKDGen consortium and (ii) from the UK Biobank.<sup>15</sup> Similarly, we selected  
158 six major CVDs from large meta-analyses for greater statistical power and clinical  
159 relevance. We extracted GWAS summary statistics for AF from a genome-wide  
160 meta-analysis that included 60,620 cases and 970,216 controls of European ancestry  
161 across six studies: The Nord-Trøndelag Health Study (HUNT), deCODE, the Michigan  
162 Genomics Initiative (MGI), DiscovEHR, UK Biobank, and the AFGen Consortium.<sup>16</sup>  
163 GWAS summary statistics for CAD were from a meta-analysis encompassed 181,522  
164 cases and 984,168 controls of European ancestry, amalgamating data from nine studies  
165 not previously included along with data from the UK Biobank and  
166 CARDIoGRAMplusC4D consortium.<sup>17</sup> GWAS summary statistics for VTE were



167 obtained from a meta-analysis of seven cohorts, including the Copenhagen Hospital  
168 Biobank Cardiovascular Disease Cohort (CHB-CVDC), Danish Blood Donor Study  
169 (DBDS), Intermountain Healthcare, deCODE, UK Biobank, Million Veteran Program  
170 (MVP), and FinnGen, totaling 81,190 cases and 1,419,671 controls.<sup>18</sup> GWAS summary  
171 statistics for HF included data from 47,309 cases and 930,014 controls across 26 studies  
172 from the Heart Failure Molecular Epidemiology for Therapeutic Targets (HERMES)  
173 Consortium.<sup>19</sup> GWAS summary statistics for PAD involved 12,086 cases and 499,548  
174 controls from a genome-wide meta-analysis comprising 11 independent studies.<sup>20</sup>  
175 GWAS summary statistics for Stroke were sourced from a meta-analysis by the  
176 GIGASTROKE consortium, which included 73,652 patients and 1,234,808 control  
177 individuals.<sup>21</sup> All summary statistics are based on individuals of European ancestry due  
178 to the limited availability of well-powered GWAS for other ancestries. Further details  
179 about the traits are available in eTable 1 in Supplement 1.

180

181 Before further analysis, we implemented rigorous quality control measures on these  
182 GWAS summary statistics by aligning them with the 1000 Genomes Project Phase 3  
183 European population based on the hg19 genome build, removing SNPs lacking rsIDs or  
184 with duplicate rsIDs, restricting the analysis to autosomal chromosomes, and retaining  
185 only SNPs with a minor allele frequency (MAF) greater than 0.01. A total of 6,907,393  
186 SNPs were included in the final analysis.

187

### 188 **Genetic correlation between eGFR and CVDs**

189 In order to investigate the possible shared genetic basis of eGFR and CVDs, we  
190 estimated SNP-based heritability ( $h^2_{SNP}$ ) and evaluated genome-wide genetic  
191 correlation ( $r_g$ ) by means of cross-trait linkage disequilibrium (LD) score regression  
192 (LDSC) method.<sup>22</sup> LDSC estimates the genetic contribution to complex diseases and  
193 traits by quantifying the LD between each SNP and its neighbors. Initially, we  
194 performed univariate LDSC to estimate  $h^2_{SNP}$ , which reflects the proportion of  
195 phenotypic variation in a trait explained by shared genetic variants. LD scores were  
196 calculated for each SNP using genotypes of common SNPs within a 10 Mb window

197 sourced from the 1000 Genomes Project Phase 3 European population. SNPs in the  
198 major histocompatibility complex (MHC) region (chromosome 6: 25-35 Mb) were  
199 excluded due to their intricate LD structure. We then conducted bivariate LDSC to  
200 assess the  $r_g$  between eGFR and CVDs, using regression of LD scores against the  
201 product of z statistics from the respective diseases and traits. The  $r_g$  ranges from -1,  
202 representing a complete negative correlation, to +1, representing a complete positive  
203 correlation, with values closer to these extremes indicating stronger correlations. The  
204 intercept from LDSC may indicate a possible sample overlap among the GWAS data  
205 sets; however, it is possible to estimate the  $r_g$  in an unbiased manner, even with  
206 overlapping samples. After evaluating all pairwise  $r_g$ , we applied a Bonferroni  
207 correction for multiple comparisons, setting the significance threshold at  $P < 8.33 \times 10^{-3}$   
208 (0.05 / 6).

209

210 In order to evaluate the biological basis of the shared genetic predisposition to eGFR  
211 and CVDs, we performed stratified LDSC applied to specifically expressed genes  
212 (LDSC-SEG) to identify possible enrichment of related tissue and cell types. This  
213 method integrates multi-tissue gene expression data from sources like the  
214 Genotype-Tissue Expression (GTEx) and Franke Lab, as well as multi-tissue chromatin  
215 information from the Roadmap Epigenomics and ENCODE datasets. The GTEx  
216 project provided statistics representing key tissue types and their specific expression  
217 across 49 tissues using baseline models and complete genomes. Additionally, we  
218 incorporated tissue-specific histone marker annotations from the Roadmap  
219 Epigenomics project. This included narrow peaks for DNase Hypersensitivity,  
220 H3K27ac, H3K4me1, H3K4me3, H3K9ac, and H3K36me3 chromatin. For identified  
221 relevant tissues or cell types, we used the false discovery rate (FDR) method to correct  
222 for each dataset, with a significance threshold of  $FDR < 0.05$ .

223

#### 224 **Genetic overlap between eGFR and CVDs**

225 LDSC primarily measures the average genetic correlation of effect sizes for all SNPs  
226 across the genome. This approach can potentially obscure the shared genetic

227 architectures involving a mixture of concordant and discordant effect directions and  
228 may fail to capture specific overlapping loci and relevant genes. To address this  
229 limitation and quantify the polygenic overlap between eGFR and CVDs, we employed  
230 the causal mixture modeling approach (MiXeR).<sup>23</sup> Firstly, univariate MiXeR analyses  
231 were performed to estimate polygenicity (i.e., the count of variants explaining 90% of  
232  $h^2_{SNP}$ ) and discoverability (the proportion of phenotypic variance attributable to causal  
233 variant effect sizes).<sup>23</sup> We used data from the 1000 Genomes Project Phase 3 European  
234 population for our analyses and excluded SNPs within the structurally complex MHC  
235 region (CHR 6: 26-35 Mb). Subsequently, bivariate MiXeR analyses were conducted to  
236 ascertain the total count of trait-specific and shared causal SNPs visually represented in  
237 Venn diagrams. This delineation covers four components: unique causal variants for  
238 trait 1, unique for trait 2, shared causal variants, and shared non-causal variants. MiXeR  
239 calculates Dice coefficient scores (ranging from 0 to 1) to gauge polygenic overlap and  
240 estimates the proportion of SNPs with concordant effects within the shared genetic  
241 component. Additionally, MiXeR computes the  $r_g$  and the correlation of effect sizes  
242 within the shared genetic component ( $r_{gs}$ ). To evaluate model fit, indicative of MiXeR's  
243 predictive accuracy against actual GWAS data, we constructed conditional  
244 quantile-quantile (Q-Q) plots, used the Akaike Information Criterion (AIC), and  
245 generated log-likelihood plots. A model-based Q-Q plot that closely aligns with the  
246 actual Q-Q plot indicates strong predictive capability. A positive AIC value suggests  
247 the model adequately distinguishes itself from comparative models, indicating a  
248 reliable fit. Conversely, a negative AIC implies that the MiXeR model does not  
249 significantly differentiate from scenarios of maximum or minimum genetic overlap,  
250 rendering the genetic overlap estimate potentially unreliable.

251

### 252 **Local genetic correlation between eGFR and CVDs**

253 To estimate local genetic correlations (local- $r_{gs}$ ) between eGFR and CVDs within  
254 specific genomic regions and identify loci with mixed effect directions, we utilized the  
255 Local Analysis of [co]Variant Annotation (LAVA).<sup>24</sup> LAVA captures detailed patterns  
256 of shared genetic loci across individuals, revealing mixed effect directions obscured by

257 genome-wide  $r_g$  estimates due to opposing effects across genomic regions. Unlike the  
258 genome-wide correlation analysis using LDSC, which considers the entire genome,  
259 LAVA divides the genome into 2,495 local LD blocks and estimates  $r_g$  within each  
260 block. Differing from MiXeR's method of estimating the proportion of shared 'causal'  
261 variants with concordant effects, LAVA identifies mixed effect directions by capturing  
262 significantly correlated genetic loci. Our study began with a univariate LAVA analysis  
263 to estimate local heritability for each phenotype, considering loci with  $p$ -values  $<$   
264  $1 \times 10^{-4}$  as significant genetic signals. This approach identified 425 loci for subsequent  
265 bivariate tests to estimate pairwise bivariate local- $r_{gs}$  across the genome. We adjusted  
266 the  $p$ -values for local- $r_{gs}$  based on the number of bivariate tests, setting a  
267 Bonferroni-corrected significance threshold at  $P < 1.18 \times 10^{-4}$  ( $0.05/425$ ).

268  
269 Additionally, we employed Hypothesis Prioritisation for multi-trait Colocalization  
270 (HyPrColoc) on genomic regions with shared risk loci across multiple phenotypes to  
271 elucidate potential biological mechanisms linking traits. HyPrColoc, a Bayesian  
272 approach, identifies clusters of co-localization and candidate cause variants in the same  
273 genomic locus. It estimates the posterior probability (PP) of colocalization of multiple  
274 traits within a single causal variant, considering  $PP > 0.7$  as significant evidence of  
275 colocalization. This method enhances our understanding of how genetic variants  
276 contribute to multiple traits, offering insights into complex trait interactions.

277

### 278 **Mendelian randomization analysis between eGFR and CVDs**

279 The genetic correlation and overlap analysis explored the shared genetic foundation  
280 between eGFR and CVDs; however, whether their relationship is mediated by vertical  
281 or horizontal pleiotropy remains unclear. Latent Heritable Confounder Mendelian  
282 Randomization (LHC-MR)<sup>25</sup> provides valuable insights into the causal relationship  
283 between eGFR and CVDs by utilizing vertical pleiotropy. This approach makes full use  
284 of all genome-wide variations, improves statistical capacity, and corrects for sample  
285 overlap, rather than just significant loci throughout the genome. Critically, LHC-MR is  
286 able to distinguish between SNPs according to their co-association with a set of traits,

287 and to differentiate heritable confounding that results in  $r_g$ . This capability allows  
288 LHC-MR to provide concurrent unbiased estimates of bidirectional causal and  
289 confounder effects. The LHC-MR framework accommodates multiple pathways  
290 through which SNPs can affect the traits, including allowing for null effects, thereby  
291 enabling precise causal effect estimations. Causal estimates from LHC-MR are  
292 presented as odds ratios (ORs) with corresponding 95% confidence intervals (CIs).  
293 Causality is considered unidirectional if  $P$  is lower than the Bonferroni-corrected  
294 threshold ( $0.05 / 6 / 2 = 4.17 \times 10^{-3}$ ) and the  $P$ -value of the effect in the opposite  
295 direction is greater than 0.05. Bidirectional causality is considered if  $P < 4.17 \times 10^{-3}$  in  
296 both directions. Additionally, we employed several methods as sensitivity analyses to  
297 validate the results, including the inverse variance weighted (IVW) method, the  
298 weighted median, MR-Egger, simple mode, and weighted mode. These analyses help  
299 confirm the robustness of the causal inferences drawn from our study.

300

### 301 **SNP-level analysis**

#### 302 **Identification of pleiotropic loci between eGFR and CVDs**

303 In order to explore the effect of horizontal pleiotropy between eGFR and CVDs, we  
304 used Pleiotropic Analysis under the Composite Null Hypothesis (PLACO) to clarify the  
305 shared genetic mechanisms underlying these conditions.<sup>26</sup> PLACO identifies  
306 pleiotropic loci between two traits by testing the compound null hypothesis that a locus  
307 is related to either none or only one of them. This hypothesis is further subdivided into  
308 specific sub-scenarios: (1) M00, indicating no association with any trait; (2) M10 and  
309 M01, each indicating an association with only one of the traits; and (3) M11,  
310 representing a pleiotropic association with both traits. This method calculates the  
311 PLACO statistics by multiplying the Z-scores of the two traits ( $Z_{\text{trait1}} \times Z_{\text{trait2}}$ ) while  
312 excluding SNPs with squared Z-values above 100 to mitigate spurious signals of  
313 pleiotropy. SNPs are considered to exhibit significant genome-wide pleiotropy if their  
314  $P_{PLACO}$  is less than  $5 \times 10^{-8}$ .

315

#### 316 **Genomic loci definition and functional analysis**

317 To identify pleiotropic SNPs associated with eGFR and CVDs, we utilized the  
318 Functional Mapping and Annotation of Genome-Wide Association Studies (FUMA)  
319 platform. FUMA integrates data from a variety of biological databases to improve  
320 functional annotation, gene prioritization, and interactive visualization of GWAS  
321 outcomes.<sup>27</sup> We calculated LD scores using the 1000 Genomes Phase III European  
322 population as a reference. Firstly, independently significant SNPs achieving  
323 genome-wide significance ( $P < 5.0 \times 10^{-8}$  and  $r^2 < 0.6$ ) were identified. Lead SNPs  
324 were then determined based on their independence ( $r^2 < 0.1$ ). Genomic risk sites were  
325 delineated by merging lead SNPs within 500 kb of each other, allowing these sites to  
326 contain multiple lead SNPs. The top lead SNP at each site, defined by the lowest P  
327 value, was selected. Additionally, the directional impact of these sites was assessed by  
328 comparing Z-scores between eGFR and CVD, providing insights into their potential  
329 roles in these conditions. A GWAS site was considered novel if none of its lead,  
330 independent, or candidate SNPs overlapped with SNPs previously reported in GWAS  
331 meta-analyses. Using LocusZoom, we created a regional association plot with gene  
332 tracks, allowing us to examine the details of the relationship between each locus. To  
333 predict the functional outcomes of Top SNPs, we matched SNPs to databases  
334 containing established functional annotations, including the Annotate Variation  
335 (ANNOVAR) category, Combined Annotation-Dependent Depletion (CADD) score,  
336 RegulomeDB (RDB) score, and chromatin state.<sup>28-30</sup> The CADD score is used to  
337 predict the deleteriousness of SNP effects, incorporating 63 functional annotations. A  
338 threshold of 12.37 is generally recognized as indicative of deleterious variants, and thus,  
339 we filtered SNPs with a CADD score greater than 12.37 for location mapping. In order  
340 to prioritize eQTL genes and explore their potential regulatory role, we used  
341 RegulomeDB, which provides functional interpretation of SNPs based on curated  
342 references. The RegulomeDB scoring system, ranging from 1a (most regulatory  
343 potential) to 7 (least), helps evaluate the regulatory likelihood of SNPs. Additionally,  
344 chromatin states were used to delineate the regulatory landscape of genomic regions,  
345 with 15 classes of states predicted using 5 chromatin markers across 127 epigenomes  
346 via the ChromHMM tool.<sup>31</sup> Two methods were employed to map SNPs to genes: (i)

347 positional mapping, which assigns SNPs to genes based on their physical proximity  
348 (within a 10kb window) to known protein-coding genes in the human reference  
349 assembly, and (ii) eQTL mapping, which links SNPs to genes based on significant  
350 eQTL associations, where allelic variations in an SNP correlate with variations in gene  
351 expression levels, as identified using the GTEx database. This approach improves our  
352 understanding of the genetic structure by linking SNPs to potential functional  
353 outcomes.

354

### 355 **Colocalization analysis**

356 For FUMA-annotated pleiotropic loci, we performed a Bayesian colocalization  
357 analysis to identify potential common causal variations between trait pairs. COLOC  
358 employs a Bayesian framework to calculate the PP of five distinct hypotheses  
359 concerning shared causal variation within a genomic region.<sup>32</sup> These hypotheses assess  
360 whether one or both traits share causal variations at a specific locus. Specifically, the  
361 hypotheses are as follows: i) PPH0: Neither trait has causal variation at the locus; ii)  
362 PPH1: Only the first trait has causal variation at the locus; iii) PPH2: Only the second  
363 trait has causal variation at the locus; iv) PPH3: Each trait has a different causal  
364 variation within the locus; v) PPH4: Both traits share a causal variation within the  
365 locus.<sup>33</sup> The SNP exhibiting the highest PPH4 within the locus is identified as the  
366 candidate causal variant. Loci are considered colocalized if the PPH4 exceeds 0.7,  
367 indicating a strong likelihood that the locus harbors shared causal variations for the  
368 traits under study.

369

370

### 371 **Gene-level analysis using MAGMA, eMAGMA and TWAS**

372 To identify candidate pleiotropic genes further, we conducted Multi-marker Analysis of  
373 GenoMic Annotation (MAGMA) based on results from PLACO and individual GWAS.  
374 MAGMA uses the SNP average model within the multi-regression framework to derive  
375 *P* values, and to estimate the association of the gene, and to adjust for factors such as  
376 the size of the gene, the number of SNP for each gene, and the LD between markers.<sup>34</sup>

377 Our analysis referenced the 1000 Genomes Project Phase 3 European population and  
378 used the Genome Reference Consortium Human Build 37 (hg19) for SNP locations and  
379 gene annotations. We analyzed 17,636 protein-coding genes on the MAGMA software  
380 website, focusing on genes containing at least ten SNPs to ensure computational  
381 stability. Gene based testing involves extending 10kb upstream and downstream of the  
382 gene transcription start and end sites. Because of their complicated LD patterns, we  
383 ruled out MHC regions (chr6: 25 - 35 Mb). Strict Bonferroni correction was used for  
384 adjustment for multiple trials, and in the MAGMA analysis based on the PLACO  
385 results, a significant threshold of  $P < 4.23 \times 10^{-7}$  ( $0.05 / 17636 / 6$ ) was established.

386

387 The inherent limitations of MAGMA, which assigns SNPs based solely on proximity to  
388 genes without accounting for functional associations such as gene regulation, can  
389 hinder its effectiveness in elucidating the underlying mechanisms of genetic variants.  
390 To overcome this and delve deeper into the functional implications of genetic variants  
391 associated with eGFR and CVDs, we employed the eQTL-informed MAGMA  
392 (E-MAGMA).<sup>35</sup> Operating within the same statistical framework as MAGMA,  
393 E-MAGMA uses a multi-principal component linear regression model to leverage  
394 tissue-specific eQTL data from multiple sources, aiming to identify potential causal  
395 genes for phenotypic traits. Our study utilized eQTL data from 47 tissues, enriched for  
396 differentially expressed genes in tissues as provided by the Genotype-Tissue  
397 Expression Project version 8 (GTEx v8), and referenced the 1000 Genomes Project  
398 Phase 3 European population. To mitigate potential confounding effects from the broad  
399 range of tissues, we focused on 11 specific tissues that were identified by LDSC-SEG  
400 analysis, including arterial, adipose, cardiac, whole blood, liver, EBV-transformed  
401 lymphocytes, and kidney tissues. We excluded kidney tissue from our analysis due to  
402 the absence of reference in E-MAGMA. We applied Bonferroni-adjusted  $p$ -value  
403 thresholds to accommodate multiple testing, calculated based on the number of genes  
404 analyzed in E-MAGMA and the number of statistically significant trait pairs tested. For  
405 example, the threshold for subcutaneous fat was defined as  $P < 8.67 \times 10^{-7}$  ( $0.05 / 9,603$   
406 / 6).



407

408 We conducted the Transcriptome-wide Association Study (TWAS) using single-trait  
409 GWAS results to explore the tissue specific gene expression correlation between eGFR  
410 and CVDs. TWAS combines eQTL and summary association statistics from large scale  
411 GWAS to identify genes that are associated with complex traits.<sup>36</sup> For gene expression  
412 prediction, we utilized the FUSION tool with default settings, employing various  
413 methods, including best linear unbiased prediction (BLUP), Bayesian sparse linear  
414 mixed model (BSLMM), least absolute shrinkage and selection operator (LASSO),  
415 elastic net (ENET), and Top SNP, which were used to estimate the cis-genetic  
416 component of tissue-specific gene expression. We selected the most effective predictive  
417 model to determine gene expression weights and used GWAS summary statistics to  
418 conduct the TWAS. In addition, we used the Bonferroni correction to adjust for  
419 multiple comparisons between the different tissue types analyzed.

420

#### 421 **Pathway-level analysis using MAGMA and Metascape**

422 We conducted a MAGMA gene set analysis to elucidate the biological functions of  
423 genes exhibiting pleiotropic effects on eGFR and CVDs. This analysis employs a  
424 competitive gene set framework to assess whether specific gene sets are more strongly  
425 associated with a particular phenotype than the broader genomic background. Our  
426 approach integrates gene definitions and their respective signals using MAGMA's  
427 gene-based multi-marker method. The analyzed gene set is derived from Gene  
428 Ontology (GO) and Reactome pathways, as listed in the Molecular Feature Database  
429 (MSigDB v7.5). The significance threshold was set to  $P < 0.05 / (7744 + 1654) / 6$ ,  
430 adjusted for the number of GO and Reactome pathways, as well as the number of trait  
431 pairs analysed. To elucidate the biological processes and signaling pathways associated  
432 with eGFR and CVDs, we conducted Metascape analysis on the overlapping genes  
433 identified by MAGMA and EMAGMA. Metascape provides comprehensive annotation  
434 of gene and protein, enrichment analysis, and protein-protein interaction networks,  
435 which can help to better understand the functions of genes.<sup>37</sup> We used Metascape to  
436 perform GO annotation and Reactome enrichment analysis, which utilizes the

437 hypergeometric test to identify significant ontology terms. The GO resource offers a  
438 framework and concepts to describe gene product functions across all organisms, while  
439 the Reactome knowledgebase details cellular processes, such as signaling, transport,  
440 DNA replication, and metabolism, as ordered networks of molecular transformations.  
441 Pathways with a  $p$ -value  $< 0.01$  were considered significant.

442

#### 443 **Proteome-wide Mendelian Randomization analysis using SMR**

444 To investigate potential associations between plasma protein levels and disease  
445 susceptibility, we employed Summary data-based Mendelian Randomization (SMR).  
446 This analysis integrated plasma protein quantitative trait locus (pQTL) summary  
447 statistics from the UK Biobank Pharmaceutical Proteomics Project (UKB-PPP) with  
448 GWAS summary statistics for various diseases. The UKB-PPP data, derived from the  
449 Olink proteomics platform, includes genetic associations for 2,940 plasma proteins  
450 across a cohort of 34,557 Europeans. In this context, cis-pQTLs are defined as SNPs  
451 located in the 1Mb window surrounding the transcription start site (TSS) of each  
452 protein. For SMR analysis, we only took into account the cis-pQTLs related to plasma  
453 protein levels at the genome-wide significance threshold ( $P < 5 \times 10^{-8}$ ). SMR, a method  
454 that utilizes summary-level data, assesses potential causal relationships between  
455 exposures (e.g., plasma protein levels) and outcomes (e.g., traits or diseases). In order  
456 to distinguish between pleiotropy and linkage in the cis-pQTL region, we tested  
457 multiple SNPs using the heterogeneity of instrument-dependent (HEIDI) method.  
458 Results indicating pleiotropy (HEIDI test  $P < 0.01$ ) were excluded from further analysis.  
459 In recognition of the limitations of single-SNP analyses, we also performed a  
460 sensitivity analysis using a multi-SNP-SMR test, with a P value of  $< 0.05$  being  
461 significant. A Bonferroni correction was applied to the number of unique proteins to be  
462 analyzed, and a significance threshold was set at  $P < 3.65 \times 10^{-6}$  ( $0.05 / 1958 / 7$ ).  
463 Additionally, we performed COLOC analysis to determine if the same causal variation  
464 is responsible for the association of protein levels with disease phenotype. The PP.H4  $>$   
465 0.7 for shared causal variants indicates significant colocalization of GWAS and pQTL.

466

467 **Result**

468 **Genome-wide genetic correlation between eGFR and CVDs**

469 After implementing stringent quality control, we utilized LDSC to assess  $h^2_{SNP}$  and  
470 genome-wide  $r_g$  between eGFR and CVDs. We used univariate LDSC to estimate  $h^2_{SNP}$   
471 for eGFR and each CVD. The SNP heritability estimate was highest for eGFR ( $h^2_{SNP} =$   
472 0.0708, SE = 0.0036). Among these CVDs, heritability estimates ranged from 0.0060  
473 for Stroke, the lowest (SE = 0.0005), to 0.0324 for CAD, the highest (SE = 0.0019)  
474 (Supplementary Fig. 1a and Supplementary Table 2a). We then conducted bivariate  
475 LDSC analysis to explore the  $r_g$  between eGFR and CVDs. This revealed significant  
476 negative  $r_g$  for two trait pairs: eGFR and Stroke ( $r_g = -0.0985$ , SE = 0.0309) and eGFR  
477 and VTE ( $r_g = -0.0783$ , SE = 0.0238), both surpassing the Bonferroni-corrected  
478 significance threshold ( $P < 8.33 \times 10^{-3}$ ) (Supplementary Fig. 1b and Supplementary  
479 Table 2b). However, no significant  $r_g$  was found between eGFR and AF, CAD, HF, or  
480 PAD.

481

482 **Polygenic overlap and local genetic correlation between eGFR and CVDs**

483 Nevertheless, previously described  $r_g$  may underestimate the genetic overlap between  
484 eGFR and CVDs. The fact that there is no significant  $r_g$  does not necessarily mean that  
485 there is no common genetic component among these traits. Indeed, the  $r_g$  measure does  
486 not distinguish between mixtures of concordant and discordant genetic effects and a  
487 true absence of genetic overlap. To address this limitation and more comprehensively  
488 elucidate the shared genetic underpinnings of complex polygenic features, we  
489 employed advanced analytical tools, MiXeR and LAVA, specifically designed to  
490 provide more detailed insights into genetic architectures that traditional analyses might  
491 obscure.

492

493 We conducted MiXeR analyses to quantify the polygenic genetic overlap between  
494 eGFR and CVDs, accounting for mixed effect directions. Initially, univariate MiXeR  
495 analyses estimated that approximately 2,044 variants (SD = 111) influence eGFR.  
496 Among the CVDs, HF had the highest polygenicity, with 2,286 'causal' variants

497 accounting for 90% of HF  $h^2_{SNP}$  (SD = 215), followed by CAD with 1,431 variants (SD  
498 = 311), and stroke with 1,039 variants (SD = 120) (Supplementary Table 3a).  
499 Subsequently, bivariate analyses revealed significant polygenic overlap between eGFR  
500 and these CVDs, with Dice coefficients ranging from 0.024 to 0.457 (Fig. 2a,  
501 Supplementary Fig. 2, Supplementary Table 3b). Notably, eGFR displayed a moderate  
502 genetic overlap with diseases like CAD (Dice = 0.457), HF (Dice = 0.39), and stroke  
503 (Dice = 0.35). Among these, the eGFR-HF pair possessed the highest number of shared  
504 'causal' variants (841, SD=151), accounting for substantial proportions of variants  
505 affecting each condition (41.1% for eGFR and 36.8% for HF), suggesting highly  
506 similar genetic architectures between these two traits. However, the genetic correlation  
507 ( $4.78 \times 10^{-4}$ , SD=9.83E-3) and the correlation coefficients of genetic risk ( $9.62 \times 10^{-4}$ ,  
508 SD=0.024) between eGFR and HF were notably weak. This extensive genetic overlap,  
509 coupled with weak  $r_g$ , highlights the existence of mixed effects, as demonstrated by the  
510 proportion of shared 'causal' variants with consistent effects (0.50, SD = 0.007). A  
511 similar relationship was observed between eGFR-CAD and eGFR-Stroke, with the  $r_g$   
512 and  $r_{gs}$  ( $r_g = -0.098$ ;  $r_{gs} = -0.269$ ) of eGFR-Stroke consistent with their  
513 LDSC-estimated significant negative genetic correlations. Compared to diseases with  
514 lower polygenicity, such as AF, VTE, and PAD, eGFR is characterized as a highly  
515 polygenic trait, leading to significant disparities in the number of shared and unique  
516 'causal' variants. For instance, the eGFR-VTE pair demonstrated mild genetic overlap  
517 (Dice = 0.177) with 211 shared variants (SD = 83), accounting for 10.3% of eGFR's and  
518 66.2% of VTE's heritability, and exhibited the highest genetic risk correlation ( $r_g =$   
519  $-0.115$ , SD = 0.007). Conversely, the eGFR-PAD pair had the fewest shared variants (28,  
520 SD = 15), but the shared genetic components showed the strongest correlation ( $r_{gs} =$   
521  $0.567$ , SD = 0.351), indicating that while many eGFR-associated variants do not  
522 influence PAD, those that do have highly similar effects (Supplementary Fig. 2).  
523  
524 LAVA, which calculates local- $r_{gs}$ , was employed to explore further the relationships  
525 between eGFR and CVDs, revealing mixed effect directions. First, univariate analyses  
526 were conducted to identify heritable regions, filtering out loci devoid of univariate

527 heritability (Supplementary Table 4), leading to 425 bivariate tests. While no  
528 significant genome-wide  $r_g$  emerged between eGFR and diseases such as AF, CAD, HF,  
529 or PAD, LAVA identified specific regions with significant local- $r_{gs}$  ( $P < 0.05$ , Fig.2b  
530 and Supplementary Table 5). This was particularly notable between eGFR and CAD,  
531 where 27 positively and 28 negatively correlated regions were found, suggesting that  
532 the overall non-significant genome-wide correlation could result from  
533 counterbalancing local effects. Similarly, mixed effects were observed with other  
534 diseases: eGFR and AF exhibited 17 positive and 18 negative regions, HF showed 5  
535 positive and 4 negative regions, and PAD had an equal number of positive and negative  
536 regions (4 each). Contrary to these, eGFR and VTE displayed more negatively  
537 correlated regions (12 positive / 23 negative), aligning with the negative genome-wide  
538 correlations estimated by LDSC. However, the findings for eGFR and Stroke, which  
539 presented more positively than negatively correlated regions, did not consistently align  
540 with the negative  $r_g$  estimated by LDSC, though 5 negatively correlated regions were  
541 still identified. After applying the Bonferroni correction, 36 genetic regions showed  
542 significant local- $r_{gs}$ . Notably, three genetic regions were linked to multiple trait pairs:  
543 LD block 96 on chromosome 1 was associated with both eGFR-CAD and eGFR-VTE;  
544 LD blocks 673 on chromosome 4 and 1057 on chromosome 6 exhibited correlations  
545 between eGFR-AF and eGFR-CAD. Further analysis using HyPrColoc identified  
546 shared causal variants, with SNP rs12740374 in LD block 96 showing strong  
547 co-localization evidence of influencing eGFR-VTE and CAD with a PP greater than  
548 0.7.

549

550 In summary, we systematically quantified the genetic overlap between eGFR and six  
551 major CVDs using MiexR and LAVA, going beyond simple genome-wide  $r_g$ . These  
552 analyses highlighted significant shared genetic bases between eGFR and the CVDs,  
553 which were not apparent from traditional genome-wide studies alone. Building on these  
554 findings, we performed further pleiotropy analysis to delve deeper into the molecular  
555 mechanisms underlying these trait pairs.

556

557 **Causal effects identified between eGFR and CVDs**

558 Based on the above-mentioned common genetic basis between eGFR and CVDs, we  
559 implemented multiple pleiotropy methods to reveal the potential mechanisms of  
560 vertical or horizontal pleiotropy. Among them, in terms of vertical pleiotropy, we used  
561 LHC-MR technology to study causal relationships while controlling bias and  
562 confounding factors. Our analysis found that AF had a significant reverse causal effect  
563 on eGFR (OR: 0.806; 95% CI = 0.720 to 0.903), which suggests that the presence of AF  
564 may reduce eGFR. In addition, we observed another pair of significant negative causal  
565 relationships, indicating that an increase in eGFR would reduce the risk of VTE (OR =  
566 0.931; 95% CI = 0.899 to 0.964) (Fig. 3, Supplementary Table 6a). These findings were  
567 confirmed by the results of the IVW method. In summary, our MR study provides  
568 strong evidence for the causal relationship between AF and eGFR and between eGFR  
569 and VTE (Supplementary Fig. 5, Supplementary Table 6b). However, it must be  
570 recognized that vertical pleiotropy alone cannot fully explain the common genetic basis  
571 between eGFR and CVDs.

572

573 **Pleiotropic genomic loci identified between eGFR and CVDs**

574 Given the extensive genome-wide genetic overlap, we further tested pleiotropic SNPs  
575 between eGFR and CVDs by PLACO, and a total of 20,073 SNPs ( $P < 5 \times 10^{-8}$ ) were  
576 identified as significant pleiotropic variants. FUMA aggregated these SNPs into 508  
577 loci, involving 226 unique chromosomal regions, of which 32 loci appeared in over 50%  
578 of trait pairs (Fig. 4, Supplementary Fig 6, Supplementary Table 7). Notably, loci such  
579 as 6q25.3 (SLC22A1), 8p23.1 (BLK), 9q34.2 (ABO), and 6p21.1 (*CRIP3*) showed  
580 overlap across all six trait pairs, while 12q24.12 (*ALDH2*) appeared in five. These  
581 broad pleiotropic effects are exemplified by the common variants at 6p21.1, which are  
582 associated with both polycystic kidney disease and stroke, and by 12q24.12, a locus  
583 significant for CAD and stroke. Interestingly, 24 pleiotropic loci had not been reported  
584 in previous eGFR and CVD studies, which reported 81 and 364 loci, respectively.  
585 Targeted analysis within the 508 pleiotropic loci revealed that 139 top SNPs (27.4%)  
586 indicated an increased risk for these traits, while 118 (23.2%) indicated a reduced risk.

587 The remaining 251 top SNPs (49.4%) showed discordant associations, highlighting  
588 potential contrasting biological mechanisms. Functional annotation using FUMA  
589 identified that 330 SNPs (65.0%) were intronic variants, 127 (25.0%) were intergenic,  
590 and 21 (4.1%) were exonic, including 14 mRNA and 7 non-coding RNA exon variants.  
591 Moreover, 40 SNPs in these risk loci, including rs34312154 with the highest CADD  
592 score of 31, may be potentially harmful, affecting genes like *HOXB1* to *HOXB8*.  
593 Additionally, 58 SNPs identified by RegulomeDB as potentially affecting transcription  
594 factor binding underscore the regulatory significance of these findings, with rs4918003  
595 showing the most potent evidence of regulatory potential (RDB: 1b).

596

597 Further analysis of co-localization at 508 identified loci revealed that 74 loci (14.6%)  
598 exhibit high PP (PPH4 > 0.7), indicating strong evidence of shared genetic signals (Fig.  
599 4, Supplementary Fig. 7, Supplementary Table 7). Of these, 71 top SNPs were  
600 identified as candidate common pathogenic variants. Notably, the 1p13.3 locus showed  
601 significant pleiotropy, influencing the trait pairs of eGFR-CAD, eGFR-VTE, and  
602 eGFR-HF, with PPH4 values ranging from 0.956 to 0.998. Subsequent HyPrColoc  
603 analysis identified rs660240 in the *CELSR2* gene at this locus as exhibiting strong  
604 co-localization for both eGFR and HF and eGFR and VTE, with PP exceeding 0.7.

605

#### 606 **Identification of pleiotropic genes between eGFR and CVDs**

607 We used MAGMA analysis to convert the SNP level signals of identified eGFR-CVDs  
608 into gene level signals, focusing on potential pleiotropy within or overlapping 508  
609 pleiotropic loci. This analysis identified 802 significant pleiotropic genes, with 579  
610 being unique. Notably, 379 genes were implicated in more than one trait pair, providing  
611 robust statistical evidence for shared genetic inheritance across diverse traits (Fig. 5,  
612 Supplementary Table 11). Specific genes such as *ATXN2* (located at 12q24.12)  
613 significantly impacted five trait pairs. Additionally, genes including *ABO* (9q34.2),  
614 *BRAP* (12q24.12), *SH2B3* (12q24.12), *L3MBTL3* (6q23.1), *MMP24* (19q13.32),  
615 *MRPS21* (1q21.2), and *PRPF3* (1q21.2) were significant across four trait pairs,

616 underscoring their pivotal roles in these genetic networks. Remarkably, the 12q24.12  
617 locus, home to *ATXN2*, *BRAP*, and *SH2B3*, is critical in assessing genetic risks for  
618 hypertension<sup>38</sup> and CKD, with *ATXN2* linked to myocardial infarction, renal function,  
619 and hypertension.<sup>39</sup> Among the genes identified, 118 were not previously explored in  
620 eGFR studies, and 410 were new to CVD research, highlighting significant novel  
621 findings. Positional mapping in FUMA confirmed 97.88% of these risk genes identified  
622 by MAGMA, further solidifying the evidence for a shared genetic framework across  
623 these trait pairs (Supplementary Table 9).

624

625 We employed the LDSC-SEG method to perform tissue-specific genetic analysis,  
626 identifying distinct tissue associations for each trait. The analysis revealed significant  
627 gene expression enrichment for eGFR in the renal cortex and liver tissues. Similarly,  
628 AF showed considerable enrichment in the atrial appendage and cardiac left ventricular  
629 tissues, while CAD was significantly enriched in the aorta, coronary artery, and tibial  
630 artery tissues, with all exceeding an FDR threshold of 0.05. Subsequent LDSC-SEG  
631 chromatin analysis corroborated these findings, enhancing the resolution by detecting  
632 significant tissue chromatin signals associated with eGFR, AF, and CAD traits  
633 (Supplementary Fig. 3, Supplementary Table 14).

634

635 We conducted E-MAGMA analysis on ten related tissues using tissue-specific eQTL  
636 information, which identified 1,276 pleiotropic genes that remained significant after  
637 Bonferroni correction, showing strong enrichment in at least one of the analyzed tissues  
638 (Supplementary Table 15). Particularly noteworthy, 26 genes were prevalent in over 50%  
639 of trait pairs, with *KAT5* and *PROCR* appearing in five trait pairs each and *BLK* and  
640 *SLC22A1* in four. *KAT5*, or lysine acetyltransferase 5, serves a dual role; it regulates the  
641 level of acetylation of target proteins, affecting the expression of inflammation related  
642 genes and the intensity of inflammatory responses. This regulatory function is crucial,  
643 as abnormal expression or dysfunction of *KAT5* can elevate cardiovascular disease risks  
644 by affecting the inflammatory pathway.<sup>40</sup> Additionally, *KAT5* acts as a DNA repair  
645 factor, vital for preventing ischemic acute kidney injury (AKI), primarily by regulating



646 glomerular filtration.<sup>41</sup> Therefore, the normal function and activity of *KAT5* are critical  
647 in preventing or alleviating AKI and indirectly maintaining or enhancing eGFR levels.  
648 We also performed the TWAS to assess the tissue specificity of pleiotropic genes for  
649 each trait, leading to the discovery of 354 new genes associated with eGFR and 142  
650 new genes related to various CVDs (Supplementary Table 16). Furthering our  
651 investigation, we utilized FUMA for eQTL mapping, identifying 2,049 genes, of which  
652 71.40% were confirmed by our analysis to be associated with the traits under study  
653 (Supplementary Table 9).

654

655 MAGMA and E-MAGMA analyses have jointly identified 424 pleiotropic genes,  
656 including 314 unique ones, shedding light on the common mechanisms underlying  
657 various trait pairs (Supplementary Table 11). Notably, 76 of these genes recur across  
658 multiple trait pairs, with genes such as *MMP24*, *L3MBTL3*, and *ABO* being prominent  
659 in half or more of the analyzed traits. Specific genes like *ABO* (9q34.13), *PROCR*  
660 (20q11.22), *BLK* (8p23.1), *ALDH2* (12q21.31), and *SLC22A1* (6q25.3) each featured in  
661 three different trait pairs, highlighting their significant roles in multiple pathologies.  
662 For instance, *L3MBTL3* has been implicated in renal dysfunction and cardiovascular  
663 pathogenesis, illustrating the interconnectedness of renal and cardiovascular systems.  
664 *MMP24*'s dysregulated expression, associated with renal tubular atrophy and diabetic  
665 nephropathy (DN), may contribute to structural and functional kidney impairments that  
666 exacerbate cardiovascular risk. In addition, the *ABO* gene, which is associated with  
667 changes in von Willebrand factor (VWF) plasma levels, plays a key role in regulating  
668 platelet function and atherosclerosis, thus affecting the severity of CAD. While the  
669 precise mechanisms connecting ABO genes to eGFR remain elusive, their association  
670 with conditions like type 2 diabetes (T2D) and hypertension, which are main risk  
671 factors for CKD, likely impacts eGFR.<sup>42</sup>

672

### 673 **Shared biological mechanisms between eGFR and CVDs**

674 We employed the MAGMA algorithm to assess pathway enrichment among the

675 identified genes, setting a stringent Bonferroni-corrected threshold ( $P < 8.87 \times 10^{-7}$ ).  
676 This analysis revealed 78 significantly enriched pathways, comprising 73 Gene  
677 Ontology Biological Process (GO BP) terms and 5 Reactome gene set pathways,  
678 indicative of key biological processes (Supplementary Table 17a). Notably, pathways  
679 such as the positive regulation of macromolecule biosynthetic processes, transcription  
680 by RNA polymerase II, and RNA metabolic processes were enriched in half or more of  
681 the trait pairs, highlighting their crucial roles in the regulation of core biological  
682 processes that contribute to the development of the studied traits.

683

684 Further analysis of pathway enrichment for overlapping genes, identified in multiple  
685 trait pairs from MAGMA and E-MAGMA analyses, was conducted using the  
686 Metascape website (Supplementary Table 17b). This analysis pinpointed 16  
687 significantly enriched pathways predominantly involved in regulating biosynthetic and  
688 metabolic processes, lipid metabolism, and receptor signal transduction. The pathways  
689 related to glutathione breakdown and stem cell maintenance were critical and had  
690 profound implications for eGFR and CVDs. The antioxidant and anti-inflammatory  
691 properties of glutathione are essential for cardiovascular protection. However, its  
692 degradation may elevate the risk of CVDs through mechanisms linked to renal  
693 insufficiency. Moreover, the protective roles of endothelial progenitor cells (EPC) and  
694 stem cell factor (SCF) within the kidney are critical for maintaining eGFR and CVDs  
695 health, implying that diminished activity in these pathways could adversely affect renal  
696 and cardiovascular systems.

697

### 698 **Proteome-wide Mendelian Randomization analysis for eGFR and CVDs**

699 We conducted a SMR analysis utilizing GWAS summary data for eGFR, six major  
700 CVDs, and plasma protein pQTLs. This analysis identified 78 risk proteins, 32 linked  
701 to eGFR and 46 to CVDs, validated through HEIDI evaluation ( $P > 0.01$ ), multiple  
702 SNP-SMR sensitivity analysis ( $P < 0.05$ ), and Bonferroni corrections ( $P_{SMR} < 0.05 /$   
703  $(1958 \times 7)$ ). Subsequently, we investigated potential pleiotropic effects within specific  
704 eGFR-CVD pairs, identifying three signature pairs that contain pleiotropic proteins

705 (Supplementary Table 18). Notably, CELSR2 was common between eGFR-CAD and  
706 eGFR-VTE, while FGF5 linked eGFR-AF and eGFR-CAD. Additionally, a  
707 colocalization analysis of these 78 proteins sought to identify common pathogenic  
708 variants associated with specific eGFR or CVDs signatures. This analysis showed  
709 strong evidence of colocalization for 49 proteins (41 unique), with 17 proteins  
710 associated with eGFR and 32 with CVDs. Proteins such as CELSR2 and FGF5,  
711 emphasized in the SMR analysis, displayed strong evidence of colocalization across  
712 three identified signature pairs, underscoring a shared pathogenic pathway across these  
713 conditions.

714

## 715 **Discussion**

716 In this study, a comprehensive genome-wide pleiotropy analysis was carried out to  
717 investigate the genetic correlation and overlap between eGFR and CVDs, uncovering a  
718 complex shared genetic foundation. Our detailed investigations identified key  
719 pleiotropic loci and genes, including *L3MBTL3*, *MMP24*, and *ABO*, and illuminated  
720 crucial biological pathways such as stem cell population maintenance and glutathione  
721 metabolism. Additionally, using MR analysis, we indicated a causal relationship  
722 between eGFR and VTE, as well as between AF and eGFR. Collectively, the results  
723 provide a better understanding of the shared genetic etiology and biological  
724 mechanisms that underlie the relationship between eGFR and CVDs, opening new  
725 avenues for targeted therapeutic strategies and further research.

726

727 Our analysis probed the shared genetic architectures of eGFR and six major CVDs  
728 using complementary genetic tools—LDSC, MiXeR, and LAVA—to reveal extensive  
729 shared genetic bases across all trait pairs. LDSC highlighted significant negative global  
730  $r_g$  between eGFR and VTE and Stroke, contrasting with previous studies that reported  
731 no significant associations. This underscores the advantage of our approach and the  
732 benefits of a larger sample size. Despite the absence of significant global correlations  
733 for certain traits, MiXeR identified substantial overlap for CAD, HF, and AF with  
734 eGFR, indicating mixed effect directions even when global correlations are not evident.

735 LAVA provided further insights into local- $r_{gs}$ , revealing mixed effect directions not  
736 apparent from genome-wide estimates, such as those observed between eGFR and  
737 CAD, which exhibited both positively and negatively correlated loci. This suggests a  
738 more nuanced genetic relationship than previously recognized. Moreover, employing  
739 bivariate MiXeR revealed extensive genetic overlap between eGFR and CAD,  
740 supported by LAVA's local- $r_{gs}$ , highlighting concordant and discordant effect  
741 directions. Our comprehensive analysis confirms the shared genetic foundations  
742 between eGFR and various CVDs, indicating multiple common genetic variants  
743 influencing critical biological pathways.

744

745 Our findings elucidate the shared genetic bases between eGFR and CVDs, attributable  
746 to both horizontal pleiotropy and direct causal mechanisms (vertical pleiotropy). Our  
747 MR analysis effectively separated potential causal effects from other genetic influences.  
748 Notably, the LHC-MR results identified a reverse causal relationship of eGFR on VTE,  
749 a finding supported by Yuan et al.<sup>43</sup> This causal relationship is likely driven by impaired  
750 kidney function, which increases coagulation factors and decreases endogenous  
751 anticoagulants, collectively promoting thrombus formation. Additionally, our analysis  
752 indicates a potential causal influence of AF on eGFR, aligning with previous studies  
753 that suggest AF can lead to renal impairments via mechanisms such as  
754 thromboembolism and reduced renal microvascular blood flow.<sup>12,44</sup> However, our  
755 analysis did not establish causal relationships for other trait pairs, suggesting that while  
756 genetic overlaps between eGFR and CVDs are partially driven by causality, the  
757 complexity of these relationships varies across different conditions.

758

759 Our cross-trait meta-analysis has identified many genome-wide significant pleiotropic  
760 loci associated with eGFR and CVDs. Notably, loci such as 8p23.1 (*BLK*) and 6q25.3  
761 (*SLC22A1*) demonstrated significance across six trait pairs, while others like 12q24.12  
762 (*ALDH2*) and 20q11.22 (*PROCR*) were significant in over 50% of the trait pairs.  
763 Specifically, the *BLK* gene at 8p23.1 enhances insulin synthesis and secretion, linking  
764 it to CKD symptoms and complications in nephropathy and diabetes by increasing the

765 production of pro-inflammatory cytokines. BLK is also identified as a susceptibility  
766 gene for Kawasaki disease,<sup>45</sup> a systemic vasculitis that can impact coronary arteries and  
767 increase CVDs risks.<sup>46</sup> Furthermore, the locus *SLC22A1* at 6q25.3 is associated with  
768 DN, a severe complication of diabetes characterized by persistent albuminuria,  
769 declining eGFR, and elevated arterial blood pressure, which elevates the risk for CVDs  
770 and cerebrovascular diseases.<sup>47</sup> The role of this locus in hypertension underscores its  
771 potential as a mediator of underlying disease risks. The consistency of effect alleles in  
772 nearly half of the significant SNPs for both eGFR and CVD supports a positive  
773 association between these conditions and provides insights into their complex  $r_g$ .

774

775 Our analysis has identified several key pleiotropic genes in over 50% of the trait pairs,  
776 including *L3MBTL3* (6q23.1), *MMP24* (20q11.22), and *ABO* (9q34.2). For example,  
777 *L3MBTL3* significantly influences the risk of coronary heart disease (CHD) by  
778 modulating adipogenesis, the process of fat cell differentiation. Dysfunctional adipose  
779 tissue can lead to ectopic fat accumulation, which promotes insulin resistance and other  
780 metabolic disorders, escalating the risk for obesity-related CHD. These metabolic  
781 disturbances further amplify the risk of ischemic stroke by intensifying common risk  
782 factors (such as hypertension and diabetes). Although *L3MBTL3*'s expression in the  
783 kidney is documented, the specific mechanisms by which it affects renal function and  
784 structure remain to be fully explored. Matrix metalloproteinase-24 (*MMP24*) plays a  
785 key role in extracellular matrix degradation, and is linked with renal tubular atrophy  
786 and the severity of alcohol-induced renal injury and fibrosis. Dysregulated *MMP24*  
787 expression detrimentally impacts both renal and cardiovascular health. In DN, *MMP24*  
788 is implicated in abnormal extracellular matrix accumulation, leading to significant  
789 damage to the glomeruli and renal tubules and indirectly impacting eGFR.<sup>48</sup> Given the  
790 close association of DN with T2D, a prominent risk factor for CVDs, *MMP24*'s role in  
791 DN could indirectly heighten the risk of CVDs.<sup>49</sup> The *ABO* gene, vital for determining  
792 blood group phenotypes, also affects crucial hemostatic factors such as VWF and factor  
793 VIII (FVIII), which are essential for platelet adhesion at injury sites. Individuals with  
794 non-O blood types generally exhibit higher VWF levels and are more susceptible to

795 VTE.<sup>50</sup> In addition, researchers have discovered a new connection between *ABO* and  
796 primary glomerulonephritis, especially IgA nephropathy, where certain blood groups  
797 are linked to an increased risk of renal function decline.<sup>51</sup> These findings highlight the  
798 complex interaction of genetics with the pathophysiology of renal and CVDs, which  
799 provides a strong basis for further study of the mechanisms and risks associated with  
800 genetic diseases.

801

802 Our study also examines the role of shared genetic determinants in two critical  
803 biological pathways, including stem cell population maintenance and glutathione  
804 catabolism, and their implications for kidney function and cardiovascular health. In the  
805 stem cell maintenance pathway, *MMP24*<sup>52</sup>, *PSRC1*<sup>53</sup>, and *CHMP1A*<sup>54</sup> play pivotal roles  
806 by regulating the stem cell cycle, ensuring cellular quiescence, and preventing  
807 premature differentiation, respectively. These molecular actions are crucial for  
808 promoting tubular cell growth and enhancing renal function, mainly through the  
809 secretion of regenerative factors such as bone morphogenetic protein-7 and hepatocyte  
810 growth factor.<sup>55</sup> The effectiveness of stem cell therapy in heart repair, particularly in  
811 those with elevated levels of inflammation, further underscores the importance of  
812 robust stem cells for optimal cardiovascular and renal outcomes. In the glutathione  
813 pathway, *DPEP1*<sup>56</sup>, *ORMDL3*, *MRPS21*, and *CPS1*<sup>57,58</sup> are crucial for maintaining  
814 cellular redox balance and defending against oxidative stress, and they are vital for  
815 stroke prevention and kidney function maintenance.<sup>59,60</sup> Variations in kidney function,  
816 reflected by changes in eGFR, can significantly affect glutathione turnover and its  
817 protective roles, directly linking renal and cardiovascular health.<sup>61</sup> Our findings suggest  
818 that targeted modulation of these key genes could significantly enhance kidney and  
819 heart repair and regeneration, thus improving eGFR and decreasing the risk of CVDs.

820

821 Our study has some limitations. Firstly, the variation in sample sizes across disorders,  
822 from 511,634 cases for PAD to 1,500,861 for VTE, restricted our ability to detect  
823 pleiotropic effects in less-represented diseases. Future studies with larger, more  
824 balanced samples will likely improve our capacity to discern these effects more

825 precisely. Additionally, including subjects with concurrent eGFR abnormalities and  
826 CVDs may have introduced bias in our assessment of genetic overlap between these  
827 conditions. Our analysis focused on shared genetic variants, excluding rare mutations  
828 that could further elucidate the complex genetic relationships involved. Moreover, the  
829 concentration on individuals of European ancestry limits the generalizability of our  
830 findings to other populations. It is crucial to conduct cross-ancestry follow-up studies to  
831 determine whether these results hold across diverse ethnic groups. Overcoming these  
832 limitations will require enhancing the diversity of GWAS populations and conducting  
833 more extensive experimental validations and cohort analyses.

834

### 835 **Conclusion**

836 Together, this study has significantly improved our understanding of the genetic basis  
837 for the role of eGFR in susceptibility to major CVDs. By identifying crucial genetic  
838 components, including key pleiotropic loci and genes such as *L3MBTL3*, *MMP24*, and  
839 *ABO*, we elucidate potential shared mechanisms that may influence critical biological  
840 pathways associated with CVDs, notably stem cell population maintenance and  
841 glutathione metabolism. These results provide a better understanding of the genetic  
842 basis of CVDs and provide a basis for the development of more targeted therapeutic  
843 and preventive strategies that could potentially transform cardiovascular care.

844

### 845 **Disclosure**

846 All authors declare no competing interests.

847

### 848 **Data Statement**

849 The study used only openly available GWAS summary statistics on estimated  
850 glomerular filtration rate and six major cardiovascular diseases that have originally  
851 been conducted using human data. GWAS summary statistics on eGFR are available at

852 <https://www.uni-regensburg.de/medizin/epidemiologie-praeventivmedizin/>  
853 [genetische-epidemiologie/gwas-summary-statistics/index.html](https://www.uni-regensburg.de/medizin/epidemiologie-praeventivmedizin/genetische-epidemiologie/gwas-summary-statistics/index.html). GWAS summary  
854 statistics on AF, HF, and Stroke are available at the GWAS Catalog (GCST90104539,  
855 GCST009541, and GCST90104539). GWAS summary statistics on CAD and PAD are  
856 publicly available for download at the Cardiovascular Disease Knowledge Portal  
857 (CVDKP) website: <https://cvd.hugeamp.org/datasets.html>. GWAS summary statistics  
858 on VTE are obtained from the deCODE genetics website: [https://www.decode.com/](https://www.decode.com/summarydata/)  
859 [summarydata/](https://www.decode.com/summarydata/). Blood-based cis-pQTL from UKB-PPP are obtained from  
860 <https://www.synapse.org/Synapse:syn51365303>.

861

## 862 **Acknowledgements**

863 This study was supported by the Natural Science Foundation of China Excellent Young  
864 Scientists Fund (Overseas) (Grant no. K241141101), Guangdong Basic and Applied  
865 Basic Research Foundation for Distinguished Young Scholars (Grant no.  
866 24050000763), Shenzhen Pengcheng Peacock Plan, Shenzhen Basic Research General  
867 Projects of Shenzhen Science and Technology Innovation Commission (Grant no.  
868 JCYJ20230807093514029) (To Y.F.), National Natural Science Foundation of China  
869 (Grant no. 82260073); Tianshan Talent Cultivation Program Project of Xinjiang Uygur  
870 Autonomous Region (Grant no. 2022TSYCLJ0028) (To Y.Y.), and Center for  
871 Computational Science and Engineering at Southern University of Science and  
872 Technology. The funder had no role in the design, implementation, analysis,  
873 interpretation of the data, approval of the manuscript, and decision to submit the



874 manuscript for publication.

875

876 **Author contributions**

877 J.Q., Y. F., Y.Y., J.X., and S.P. conceptualized and supervised this project and wrote the

878 manuscript. J.Q., K. Y., and Y.Y. performed the main analyses and wrote the manuscript.

879 J.Q., X.Y., Y.Y., L.Z., and Y.L. performed the statistical analysis and assisted with

880 interpreting the results. M.C., W.X., and Y.Y. provided expertise in cardiovascular

881 biology and GWAS summary statistics. All authors provided intellectual content and

882 approved the final version of the manuscript.

883

884 **Reference**

- 885 1. Roth, G. A. et al. Global, Regional, and National Burden of Cardiovascular  
886 Diseases for 10 Causes, 1990 to 2015. *Journal of the American College of*  
887 *Cardiology* 70, 1-25, doi:10.1016/j.jacc.2017.04.052 (2017).
- 888 2. Bays, H. E. et al. Ten things to know about ten cardiovascular disease risk  
889 factors. *American journal of preventive cardiology* 5, 100149,  
890 doi:10.1016/j.ajpc.2021.100149 (2021).
- 891 3. Popolo, A., Autore, G., Pinto, A. & Marzocco, S. Oxidative stress in patients  
892 with cardiovascular disease and chronic renal failure. *Free radical research* 47,  
893 346-356, doi:10.3109/10715762.2013.779373 (2013).
- 894 4. Ammirati, A. L. Chronic Kidney Disease. *Revista da Associacao Medica*  
895 *Brasileira* (1992) 66Suppl 1, s03-s09, doi:10.1590/1806-9282.66.S1.3 (2020).
- 896 5. Eckardt, K. U. et al. Evolving importance of kidney disease: from subspecialty  
897 to global health burden. *Lancet (London, England)* 382, 158-169,  
898 doi:10.1016/s0140-6736(13)60439-0 (2013).
- 899 6. Visseren, F. L. J. et al. 2021 ESC Guidelines on cardiovascular disease  
900 prevention in clinical practice. *European journal of preventive cardiology* 29,  
901 5-115, doi:10.1093/eurjpc/zwab154 (2022).
- 902 7. Lees, J. S. et al. Glomerular filtration rate by differing measures, albuminuria  
903 and prediction of cardiovascular disease, mortality and end-stage kidney  
904 disease. *Nat Med* 25, 1753-1760, doi:10.1038/s41591-019-0627-8 (2019).
- 905 8. Manjunath, G. et al. Level of kidney function as a risk factor for cardiovascular  
906 outcomes in the elderly. *Kidney international* 63, 1121-1129,  
907 doi:10.1046/j.1523-1755.2003.00838.x (2003).
- 908 9. Ataklte, F. et al. Association of Mildly Reduced Kidney Function With  
909 Cardiovascular Disease: The Framingham Heart Study. *Journal of the American*  
910 *Heart Association* 10, e020301, doi:10.1161/jaha.120.020301 (2021).
- 911 10. Graham, S. E. et al. Sex-specific and pleiotropic effects underlying kidney  
912 function identified from GWAS meta-analysis. *Nature communications* 10,  
913 1847, doi:10.1038/s41467-019-09861-z (2019).

- 914 11. Kelly, D. M. et al. Interplay Between Chronic Kidney Disease, Hypertension,  
915 and Stroke: Insights From a Multivariable Mendelian Randomization Analysis.  
916 *Neurology* 101, e1960-e1969, doi:10.1212/wnl.0000000000207852 (2023).
- 917 12. Geurts, S. et al. Disentangling the association between kidney function and  
918 atrial fibrillation: a bidirectional Mendelian randomization study. *International*  
919 *journal of cardiology* 355, 15-22, doi:10.1016/j.ijcard.2022.03.004 (2022).
- 920 13. Park, S. et al. Atrial fibrillation and kidney function: a bidirectional Mendelian  
921 randomization study. *Eur Heart J* 42, 2816-2823,  
922 doi:10.1093/eurheartj/ehab291 (2021).
- 923 14. Gong, W. et al. Role of the Gut-Brain Axis in the Shared Genetic Etiology  
924 Between Gastrointestinal Tract Diseases and Psychiatric Disorders: A  
925 Genome-Wide Pleiotropic Analysis. *JAMA psychiatry* 80, 360-370,  
926 doi:10.1001/jamapsychiatry.2022.4974 (2023).
- 927 15. Stanzick, K. J. et al. Discovery and prioritization of variants and genes for  
928 kidney function in >1.2 million individuals. *Nature communications* 12, 4350,  
929 doi:10.1038/s41467-021-24491-0 (2021).
- 930 16. Nielsen, J. B. et al. Biobank-driven genomic discovery yields new insight into  
931 atrial fibrillation biology. *Nature genetics* 50, 1234-1239,  
932 doi:10.1038/s41588-018-0171-3 (2018).
- 933 17. Aragam, K. G. et al. Discovery and systematic characterization of risk variants  
934 and genes for coronary artery disease in over a million participants. *Nature*  
935 *genetics* 54, 1803-1815, doi:10.1038/s41588-022-01233-6 (2022).
- 936 18. Ghose, J. et al. Genome-wide meta-analysis identifies 93 risk loci and enables  
937 risk prediction equivalent to monogenic forms of venous thromboembolism.  
938 *Nature genetics* 55, 399-409, doi:10.1038/s41588-022-01286-7 (2023).
- 939 19. Shah, S. et al. Genome-wide association and Mendelian randomisation analysis  
940 provide insights into the pathogenesis of heart failure. *Nature communications*  
941 11, 163, doi:10.1038/s41467-019-13690-5 (2020).
- 942 20. van Zuydam, N. R. et al. Genome-Wide Association Study of Peripheral Artery  
943 Disease. *Circulation. Genomic and precision medicine* 14, e002862,

- 944 doi:10.1161/circgen.119.002862 (2021).
- 945 21. Mishra, A. et al. Stroke genetics informs drug discovery and risk prediction  
946 across ancestries. *Nature* 611, 115-123, doi:10.1038/s41586-022-05165-3  
947 (2022).
- 948 22. Bulik-Sullivan, B. K. et al. LD Score regression distinguishes confounding  
949 from polygenicity in genome-wide association studies. *Nature genetics* 47,  
950 291-295, doi:10.1038/ng.3211 (2015).
- 951 23. Hindley, G. et al. Charting the Landscape of Genetic Overlap Between Mental  
952 Disorders and Related Traits Beyond Genetic Correlation. *The American*  
953 *journal of psychiatry* 179, 833-843, doi:10.1176/appi.ajp.21101051 (2022).
- 954 24. Werme, J., van der Sluis, S., Posthuma, D. & de Leeuw, C. A. An integrated  
955 framework for local genetic correlation analysis. *Nature genetics* 54, 274-282,  
956 doi:10.1038/s41588-022-01017-y (2022).
- 957 25. Darrous, L., Mounier, N. & Kutalik, Z. Simultaneous estimation of  
958 bi-directional causal effects and heritable confounding from GWAS summary  
959 statistics. *Nature communications* 12, 7274, doi:10.1038/s41467-021-26970-w  
960 (2021).
- 961 26. Ray, D. & Chatterjee, N. A powerful method for pleiotropic analysis under  
962 composite null hypothesis identifies novel shared loci between Type 2 Diabetes  
963 and Prostate Cancer. *PLoS genetics* 16, e1009218,  
964 doi:10.1371/journal.pgen.1009218 (2020).
- 965 27. Watanabe, K., Taskesen, E., van Bochoven, A. & Posthuma, D. Functional  
966 mapping and annotation of genetic associations with FUMA. *Nature*  
967 *communications* 8, 1826, doi:10.1038/s41467-017-01261-5 (2017).
- 968 28. Kircher, M. et al. A general framework for estimating the relative pathogenicity  
969 of human genetic variants. *Nature genetics* 46, 310-315, doi:10.1038/ng.2892  
970 (2014).
- 971 29. Boyle, A. P. et al. Annotation of functional variation in personal genomes using  
972 RegulomeDB. *Genome research* 22, 1790-1797, doi:10.1101/gr.137323.112  
973 (2012).

- 974 30. Kundaje, A. et al. Integrative analysis of 111 reference human epigenomes.  
975 Nature 518, 317-330, doi:10.1038/nature14248 (2015).
- 976 31. Zhu, Z. et al. Integration of summary data from GWAS and eQTL studies  
977 predicts complex trait gene targets. Nature genetics 48, 481-487,  
978 doi:10.1038/ng.3538 (2016).
- 979 32. Wallace, C. A more accurate method for colocalisation analysis allowing for  
980 multiple causal variants. PLoS genetics 17, e1009440,  
981 doi:10.1371/journal.pgen.1009440 (2021).
- 982 33. van der Linden, R. J. et al. Genetic overlap between Alzheimer's disease and  
983 blood lipid levels. Neurobiology of aging 108, 189-195,  
984 doi:10.1016/j.neurobiolaging.2021.06.019 (2021).
- 985 34. de Leeuw, C. A., Mooij, J. M., Heskes, T. & Posthuma, D. MAGMA:  
986 generalized gene-set analysis of GWAS data. PLoS computational biology 11,  
987 e1004219, doi:10.1371/journal.pcbi.1004219 (2015).
- 988 35. Gerring, Z. F., Mina-Vargas, A., Gamazon, E. R. & Derks, E. M. E-MAGMA:  
989 an eQTL-informed method to identify risk genes using genome-wide  
990 association study summary statistics. Bioinformatics (Oxford, England) 37,  
991 2245-2249, doi:10.1093/bioinformatics/btab115 (2021).
- 992 36. Gusev, A. et al. Integrative approaches for large-scale transcriptome-wide  
993 association studies. Nature genetics 48, 245-252, doi:10.1038/ng.3506 (2016).
- 994 37. Zhou, Y. et al. Metascape provides a biologist-oriented resource for the analysis  
995 of systems-level datasets. Nature communications 10, 1523,  
996 doi:10.1038/s41467-019-09234-6 (2019).
- 997 38. Levy, D. et al. Genome-wide association study of blood pressure and  
998 hypertension. Nature genetics 41, 677-687, doi:10.1038/ng.384 (2009).
- 999 39. Yamada, Y. et al. Identification of 13 novel susceptibility loci for early-onset  
1000 myocardial infarction, hypertension, or chronic kidney disease. International  
1001 journal of molecular medicine 42, 2415-2436, doi:10.3892/ijmm.2018.3852  
1002 (2018).
- 1003 40. Liu, C. et al. STUB1 is acetylated by KAT5 and alleviates myocardial

- 1004 ischemia-reperfusion injury through LATS2-YAP-  $\beta$  -catenin axis.  
1005 Communications biology 7, 396, doi:10.1038/s42003-024-06086-9 (2024).
- 1006 41. Hishikawa, A. et al. DNA repair factor KAT5 prevents ischemic acute kidney  
1007 injury through glomerular filtration regulation. iScience 24, 103436,  
1008 doi:10.1016/j.isci.2021.103436 (2021).
- 1009 42. Cano, E. A. et al. Association between ABO Blood Groups and Type 2 Diabetes  
1010 Mellitus: A Meta-Analysis. Curr Diabetes Rev 19, e270422204139,  
1011 doi:10.2174/1573399818666220427124448 (2023).
- 1012 43. Yuan, S., Bruzelius, M. & Larsson, S. C. Causal effect of renal function on  
1013 venous thromboembolism: a two-sample Mendelian randomization  
1014 investigation. Journal of thrombosis and thrombolysis 53, 43-50,  
1015 doi:10.1007/s11239-021-02494-4 (2022).
- 1016 44. Watanabe, H. et al. Close bidirectional relationship between chronic kidney  
1017 disease and atrial fibrillation: the Niigata preventive medicine study. American  
1018 heart journal 158, 629-636, doi:10.1016/j.ahj.2009.06.031 (2009).
- 1019 45. Kim, J. J. et al. Identification of B-cell-related HSPG2 and CDSN as  
1020 susceptibility loci for Kawasaki disease. Human immunology 84, 567-570,  
1021 doi:10.1016/j.humimm.2023.07.001 (2023).
- 1022 46. Newburger, J. W. et al. Diagnosis, treatment, and long-term management of  
1023 Kawasaki disease: a statement for health professionals from the Committee on  
1024 Rheumatic Fever, Endocarditis and Kawasaki Disease, Council on  
1025 Cardiovascular Disease in the Young, American Heart Association. Circulation  
1026 110, 2747-2771, doi:10.1161/01.Cir.0000145143.19711.78 (2004).
- 1027 47. Sallinen, R. et al. Association of the SLC22A1, SLC22A2, and SLC22A3 genes  
1028 encoding organic cation transporters with diabetic nephropathy and  
1029 hypertension. Annals of medicine 42, 296-304,  
1030 doi:10.3109/07853891003777109 (2010).
- 1031 48. Garcia-Fernandez, N. et al. Matrix Metalloproteinases in Diabetic Kidney  
1032 Disease. Journal of clinical medicine 9, doi:10.3390/jcm9020472 (2020).
- 1033 49. Chen, S., Chen, L. & Jiang, H. Prognosis and risk factors of chronic kidney

- 1034 disease progression in patients with diabetic kidney disease and non-diabetic  
1035 kidney disease: a prospective cohort CKD-ROUTE study. *Renal failure* 44,  
1036 1309-1318, doi:10.1080/0886022x.2022.2106872 (2022).
- 1037 50. Zhang, H., Mooney, C. J. & Reilly, M. P. ABO Blood Groups and  
1038 Cardiovascular Diseases. *Int J Vasc Med* 2012, 641917,  
1039 doi:10.1155/2012/641917 (2012).
- 1040 51. Wang, M. et al. Associations of ABO blood type and galactose-deficient  
1041 immunoglobulin A1 with adverse outcomes in patients with IgA nephropathy.  
1042 *Nephrology, dialysis, transplantation : official publication of the European*  
1043 *Dialysis and Transplant Association - European Renal Association* 36, 288-294,  
1044 doi:10.1093/ndt/gfz171 (2021).
- 1045 52. Porlan, E. et al. MT5-MMP regulates adult neural stem cell functional  
1046 quiescence through the cleavage of N-cadherin. *Nature cell biology* 16, 629-638,  
1047 doi:10.1038/ncb2993 (2014).
- 1048 53. Wilson, N. K. et al. Combined Single-Cell Functional and Gene Expression  
1049 Analysis Resolves Heterogeneity within Stem Cell Populations. *Cell stem cell*  
1050 16, 712-724, doi:10.1016/j.stem.2015.04.004 (2015).
- 1051 54. Coulter, M. E. et al. The ESCRT-III Protein CHMP1A Mediates Secretion of  
1052 Sonic Hedgehog on a Distinctive Subtype of Extracellular Vesicles. *Cell reports*  
1053 24, 973-986.e978, doi:10.1016/j.celrep.2018.06.100 (2018).
- 1054 55. Hopkins, C., Li, J., Rae, F. & Little, M. H. Stem cell options for kidney disease.  
1055 *J Pathol* 217, 265-281, doi:10.1002/path.2477 (2009).
- 1056 56. Strauer, B. E. & Steinhoff, G. 10 years of intracoronary and intramyocardial  
1057 bone marrow stem cell therapy of the heart: from the methodological origin to  
1058 clinical practice. *Journal of the American College of Cardiology* 58, 1095-1104,  
1059 doi:10.1016/j.jacc.2011.06.016 (2011).
- 1060 57. Lau, A. et al. Dipeptidase-1 governs renal inflammation during ischemia  
1061 reperfusion injury. *Science advances* 8, eabm0142,  
1062 doi:10.1126/sciadv.abm0142 (2022).
- 1063 58. Wu, J. et al. Regulation of the urea cycle by CPS1 O-GlcNAcylation in response

- 1064 to dietary restriction and aging. *Journal of molecular cell biology* 14,  
1065 doi:10.1093/jmcb/mjac016 (2022).
- 1066 59. Matuz-Mares, D., Riveros-Rosas, H., Vilchis-Landeros, M. M. & V á  
1067 zquez-Meza, H. Glutathione Participation in the Prevention of Cardiovascular  
1068 Diseases. *Antioxidants (Basel, Switzerland)* 10, doi:10.3390/antiox10081220  
1069 (2021).
- 1070 60. Bajic, V. P. et al. Glutathione "Redox Homeostasis" and Its Relation to  
1071 Cardiovascular Disease. *Oxidative medicine and cellular longevity* 2019,  
1072 5028181, doi:10.1155/2019/5028181 (2019).
- 1073 61. Hinchman, C. A. & Ballatori, N. Glutathione-degrading capacities of liver and  
1074 kidney in different species. *Biochemical pharmacology* 40, 1131-1135,  
1075 doi:10.1016/0006-2952(90)90503-d (1990).
- 1076



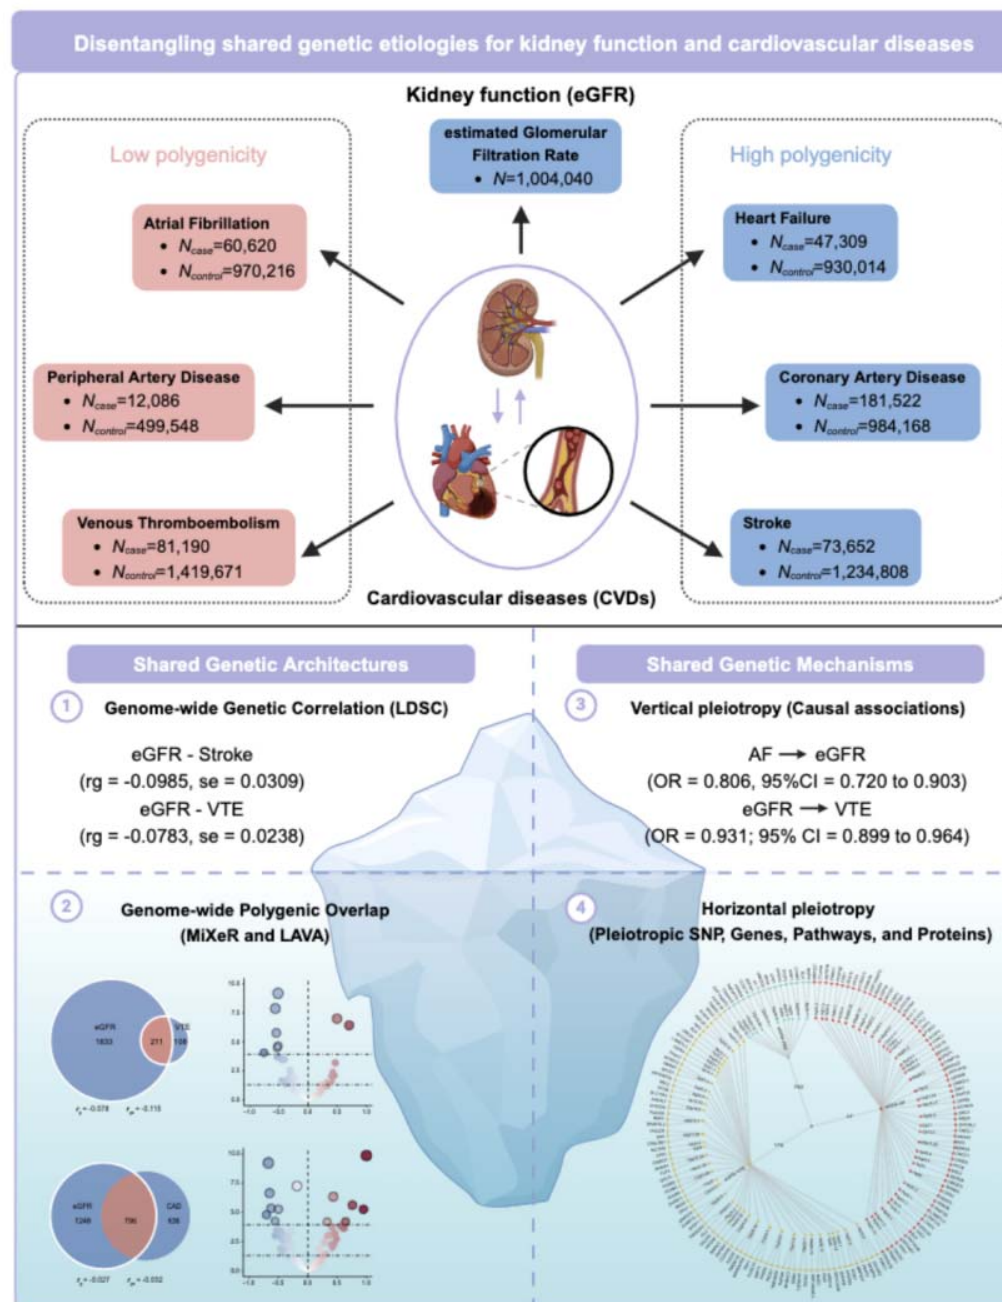

1077

1078 **Figure 1: Schematic diagram of the analysis of genetic associations between glomerular**  
 1079 **filtration rate and six major cardiovascular diseases in this study.**

1080 We analyzed the most comprehensive GWAS summary statistics to investigate the shared genetic  
 1081 architecture and potential mechanisms between eGFR and CVDs. First, the shared genetic basis was  
 1082 determined by quantifying global and local genetic correlations and exploring the global genetic  
 1083 overlap. Then, their two genetic pleiotropy were analyzed to investigate the shared genetic

1084 architecture, which can be vertical pleiotropy, that is, the effect of the variant on one trait affects  
1085 another trait or horizontal pleiotropy, that is, the variant affects multiple traits independently. We  
1086 first used Mendelian randomization on vertical pleiotropy to illustrate their causal relationship.  
1087 Then, various statistical genetic methods were used on horizontal pleiotropy to sequentially apply  
1088 pleiotropy analysis at the SNP, gene level, biological pathway, and protein target level to investigate  
1089 the common genetic mechanism. Through this comprehensive genetic pleiotropy analysis, our  
1090 understanding of the genetic link between eGFR and CVDs has been dramatically enhanced, which  
1091 may guide the development of new treatment strategies and improve the clinical management of  
1092 these diseases.

Figure 2

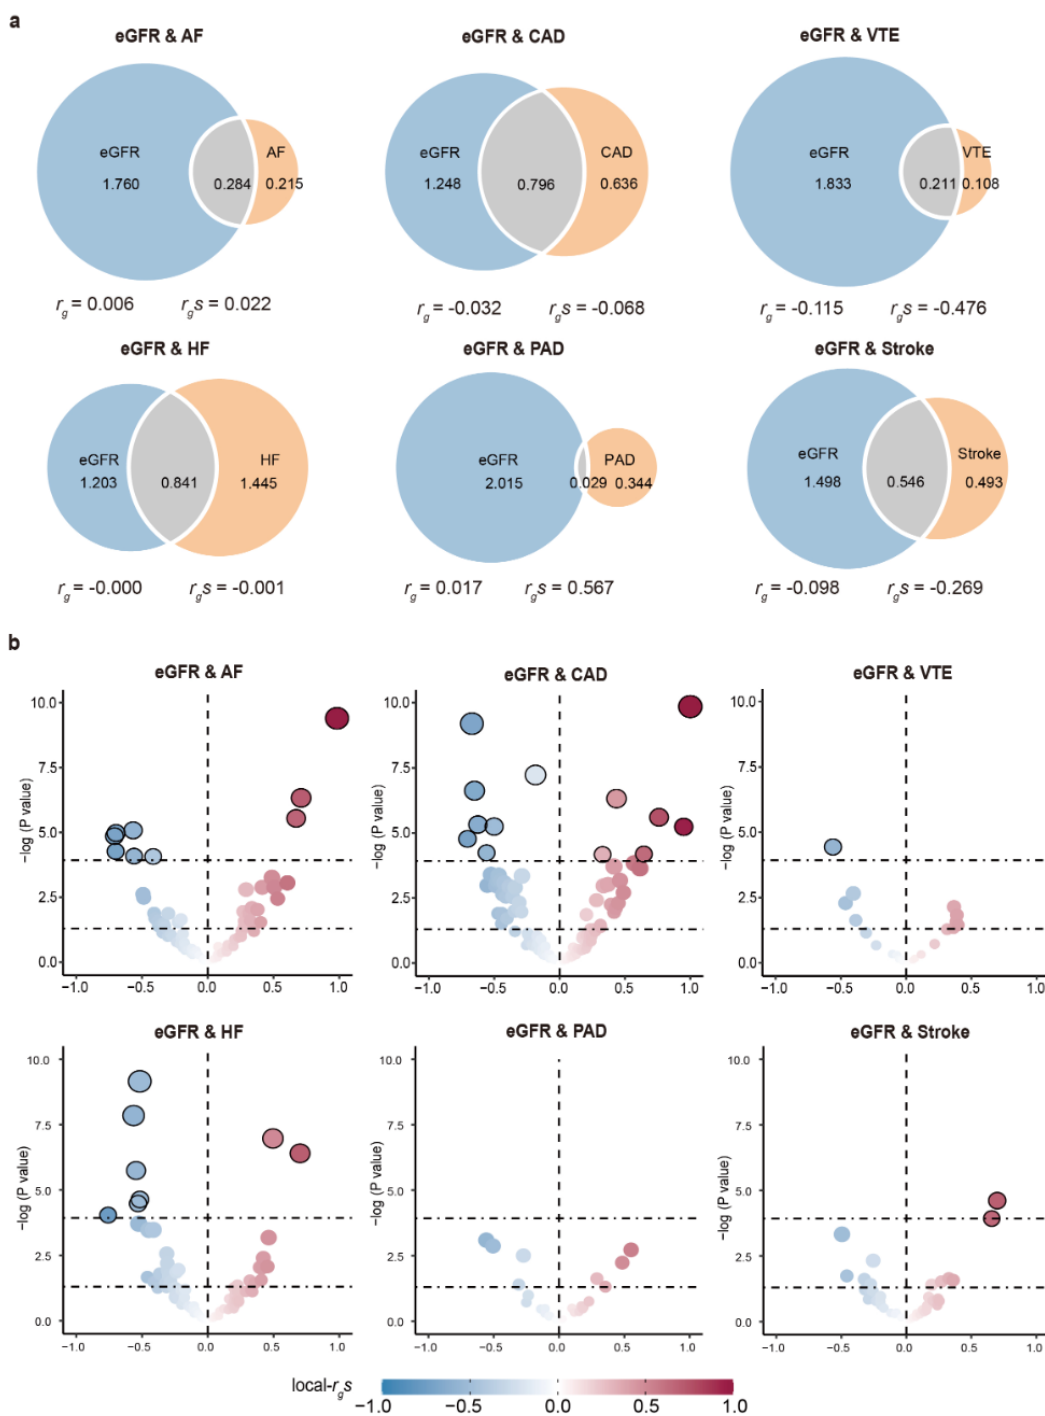

1093

1094 **Figure 2: Genetic overlap between estimated glomerular filtration rate and six major**  
 1095 **cardiovascular diseases exceeds genome-wide genetic correlation.**

1096 Genetic overlap and local genetic correlation between eGFR and six major CVDs investigated by

1097 MiXeR and LAVA. a: MiXeR Venn diagrams showing common and unique effect trait variants

1098 showing polygenic overlap (grey) between eGFR (blue) and CVDs (orange). Numbers in the Venn  
1099 diagrams indicate the estimated number of common and unique effect trait variants (in thousands)  
1100 that explain 90% of the SNP heritability and standard error in each phenotype. Circle size indicates  
1101 the degree of polygenicity for each trait, with larger circles indicating stronger polygenicity. We also  
1102 provide genome-wide genetic correlation ( $r_g$ ) and genetic correlation of shared variants ( $r_{gs}$ ). b:  
1103 LAVA volcano plots showing local genetic correlation coefficients (local- $r_{gs}$ , y-axis) for eGFR and  
1104 CVDs with  $-\log_{10} p$ -values for each trait pair of analyses for each locus. Loci above the horizontal  
1105 line are significant at  $P < 0.05$  (negative correlation for blue dots, positive correlation for red dots).  
1106 Larger points with black circles indicate loci significantly associated after Bonferroni correction ( $P$   
1107  $< 0.05 / 425$ ). LAVA-estimated local- $r_{gs}$  is shown on the blue-red scale. eGFR, estimated glomerular  
1108 filtration rate; AF, atrial fibrillation; CAD, coronary artery disease; VTE, venous thromboembolism;  
1109 HF, heart failure; PAD, peripheral arterial disease.  
1110

**Figure 3**

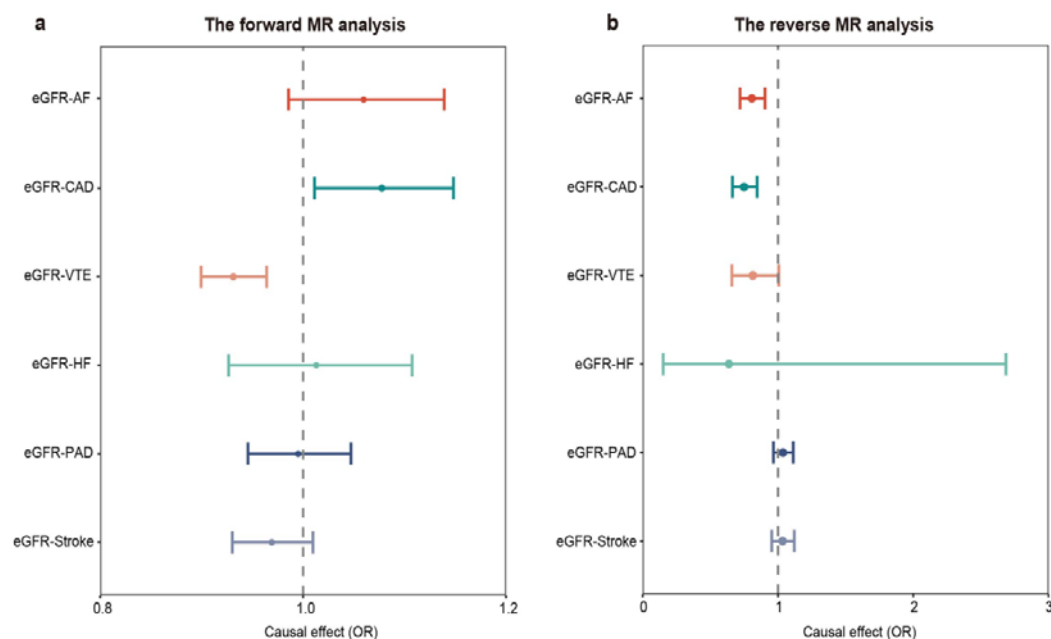

1111

1112 **Figure 3: Inference of causal relationship between estimated glomerular filtration rate and six**  
1113 **major cardiovascular diseases.**

1114 Forest plots of the causal relationship between eGFR and six major CVDs using the LHC-MR  
1115 method. a: indicates the estimated causal relationship of eGFR on CVDs. b: indicates the estimated  
1116 causal relationship of CVDs on eGFR. Circles indicate odds ratio (OR) estimates, and error bars  
1117 indicate 95% confidence intervals. OR > 1 indicates a positive association, and OR < 1 indicates a  
1118 negative association. eGFR, estimated glomerular filtration rate; AF, atrial fibrillation; CAD,  
1119 coronary artery disease; VTE, venous thromboembolism; HF, heart failure; PAD, peripheral arterial  
1120 disease.

Figure 4

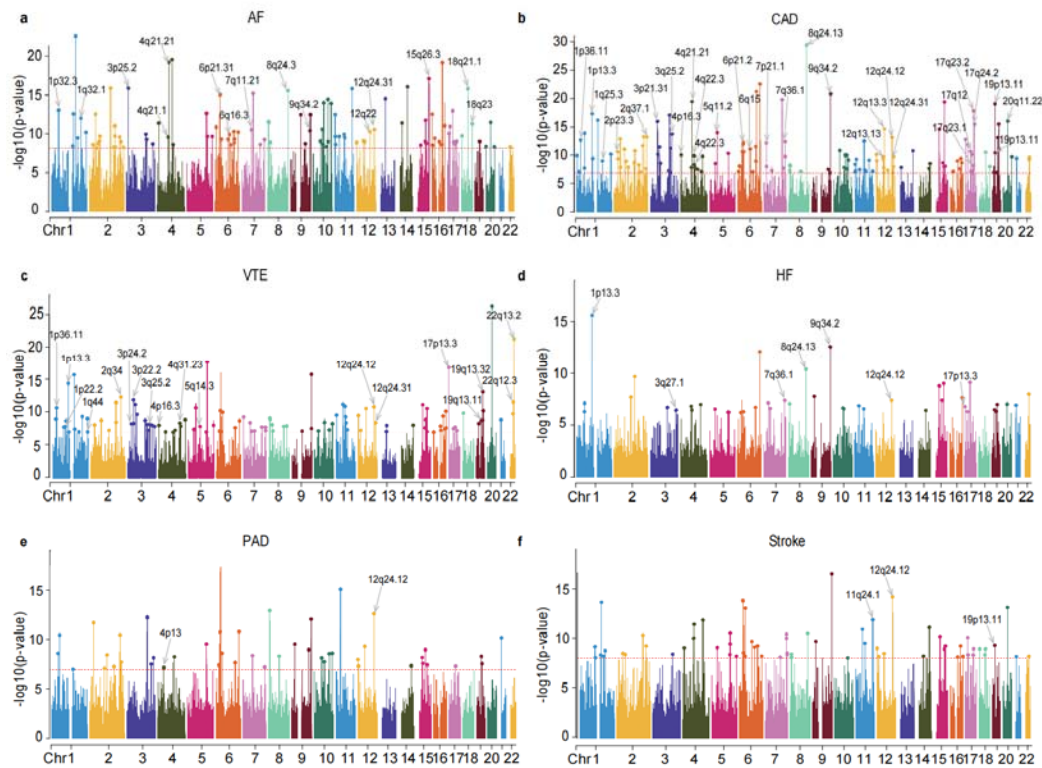

1121

1122 **Figure 4: Manhattan plot of PLACO results for estimated glomerular filtration rate and six**  
1123 **major cardiovascular diseases.**

1124 Manhattan plots reflect chromosomal position (x-axis) and negative log<sub>10</sub>-transformed *P*-values  
1125 (y-axis) for each SNP. Horizontal lines indicate genome-wide significant *P*-values  $-\log_{10}(5 \times 10^{-8})$ .  
1126 The  $r^2$  threshold for defining independent significant SNPs was set to 0.2, and the maximum  
1127 distance between LD blocks merged into one locus was set to 500 kb. *P*-values were derived using  
1128 GWAS multi-trait analysis in discovery studies, and independent genome-wide significant  
1129 associations with the smallest *P*-values (top SNPs) are circled in colored circles. Only SNPs that  
1130 were common in all summary statistics were included. Labels are chromosomal regions where  
1131 genomic risk loci with strong colocalization evidence (PP.H4 > 0.7) are located. eGFR, estimated  
1132 glomerular filtration rate; AF, atrial fibrillation; CAD, coronary artery disease; VTE, venous  
1133 thromboembolism; HF, heart failure; PAD, peripheral arterial disease.

Figure 5

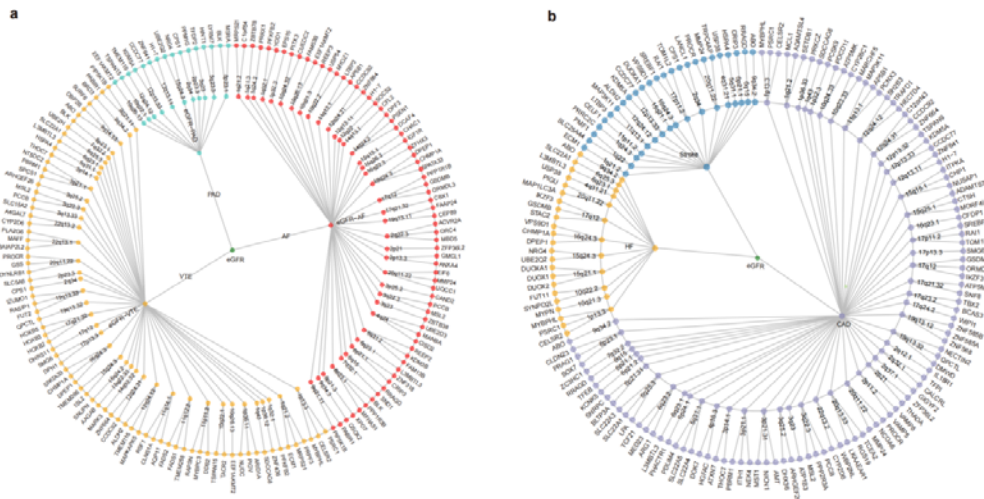

1134

1135 **Figure 5: The overall situation of the pleiotropy association between estimated glomerular**  
1136 **filtration rate and six major cardiovascular diseases**

1137 Based on the polygenic nature of the Mixer results, we separated the pleiotropic association between

1138 eGFR and CVDs into two network diagrams, showing the pleiotropic loci and genes identified in

1139 the six trait pairs. a: The circular dendrogram is centered on eGFR (inner circle) and branches out

1140 for the three CVDs (second circle, AF, VTE, and PAD). These three trait pairs show 91 pleiotropic

1141 loci (third circle) corresponding to 159 pleiotropic genes (outer circle). b: The circular dendrogram

1142 is centered on eGFR (the inner circle) and branches out for the three CVDs (second circle, CAD, HF,

1143 and stroke). Another three trait pairs show 80 pleiotropic loci (third circle) corresponding to 153

1144 pleiotropic genes (outer circle). For trait pairs with three or more pleiotropic genes, we only show

1145 the top three pleiotropic genes according to priority, and these genes show statistical priority decay

1146 in a clockwise direction. For example, eGFR-AF-12q24.31-CCDC92 and

1147 eGFR-AF-12q24.31-ZNF664 indicate that 12q24.31 is a shared locus for this pair of specific

1148 diseases involving CCDC92 and ZNF664. eGFR, estimated glomerular filtration rate; AF, atrial

1149 fibrillation; CAD, coronary artery disease; VTE, venous thromboembolism; HF, heart failure; PAD,

1150 peripheral arterial disease.
